# Supplementary material
Source: PubMed Central journal article supplement (PMC5746470)
Supplement: NIHMS915937-supplement-graphic_abstract.pdf [file NIHMS915937-supplement-graphic_abstract.pdf]

ex vivo genome editing of primary human hepatocytes

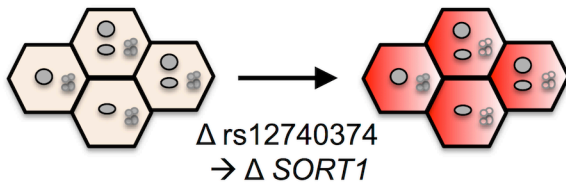

start with wild-type mouse

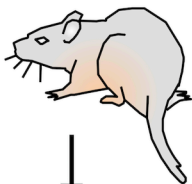

somatic in vivo genome editing of locus-humanized mouse

injection of embryo with human BAC DNA

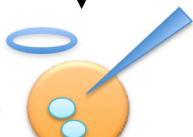

injection of virus with CRISPR-Cas9 to target human locus in liver

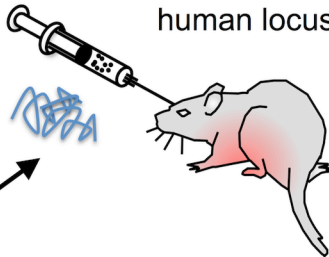

locus-humanized mouse

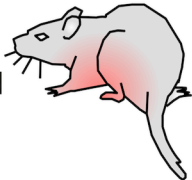

mouse with altered locus in liver

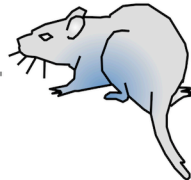

$\Delta$  rs12740374  
 $\rightarrow$   $\Delta$  SORT1

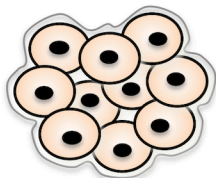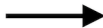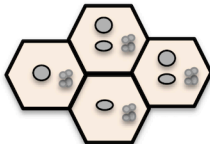

iPSC-hepatocytes fail to model rs12740374-SORT1 eQTL
